# Supplementary material for: Methylome and transcriptome signature of bronchoalveolar cells from multiple sclerosis patients in relation to smoking
Source: PubMed Central journal article supplement (PMC8145441; doi:10.1177/1352458520943768), 2020-07-30
Supplement: MSJ943768_supplemental_figures.pdf [file MSJ943768_supplemental_figures.pdf]

## Supplementary Figure 1

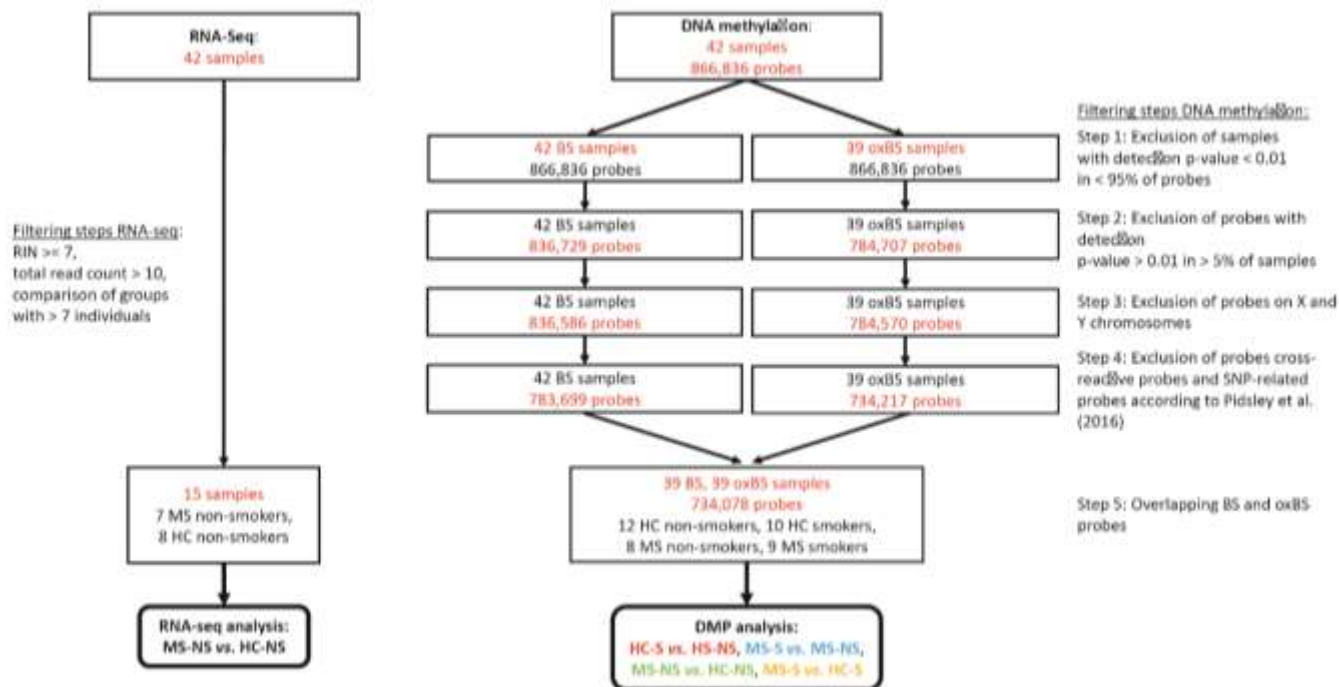

### Supplementary Figure 1. Analytical workflow

The schematic is representing the filtering steps performed before statistical analyses of RNA-seq and DNA methylation/hydroxymethylation data. Healthy controls (HC) and multiple sclerosis (MS) patients were divided into groups of smokers (S) and non-smokers (NS).

# REVISED Supplementary Figure 2

**a**

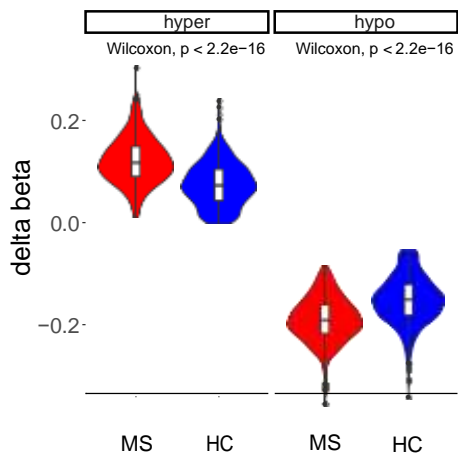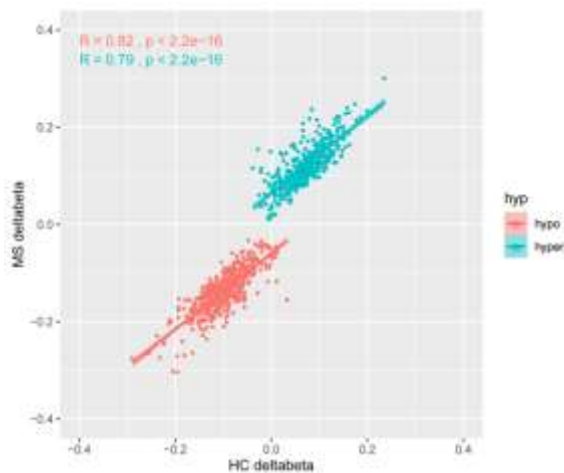

**b**

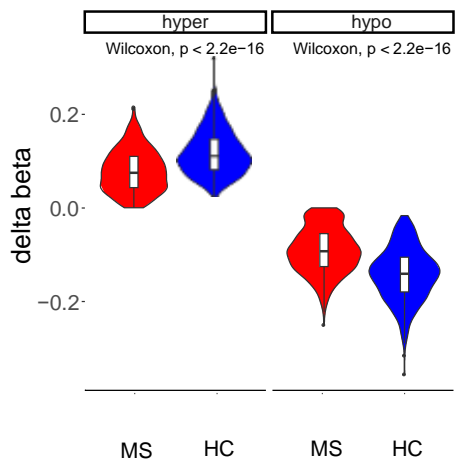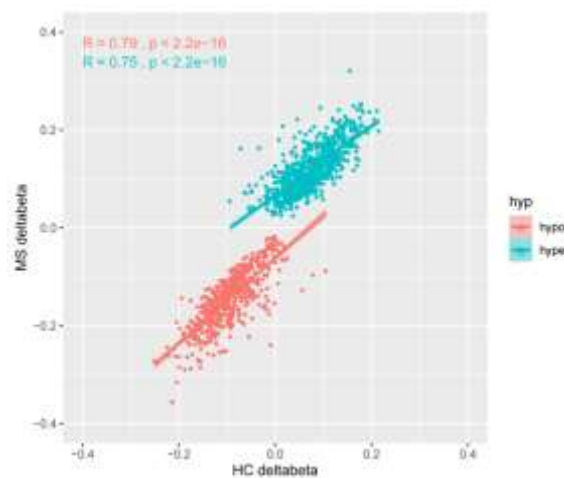

**c**

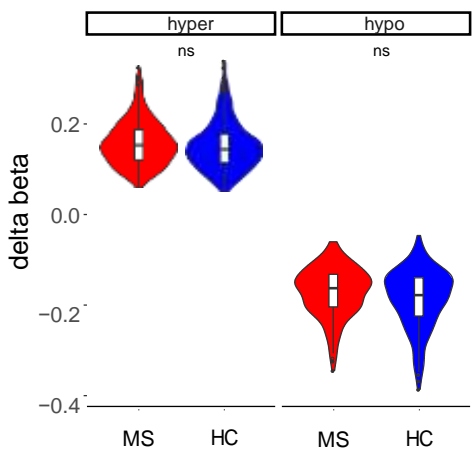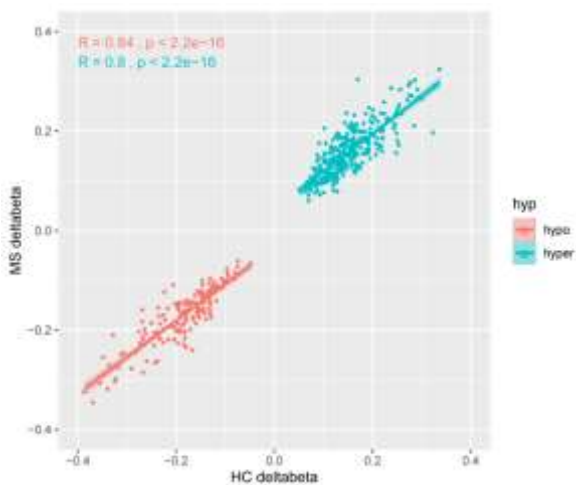

## Supplementary Figure 2 (end)

d

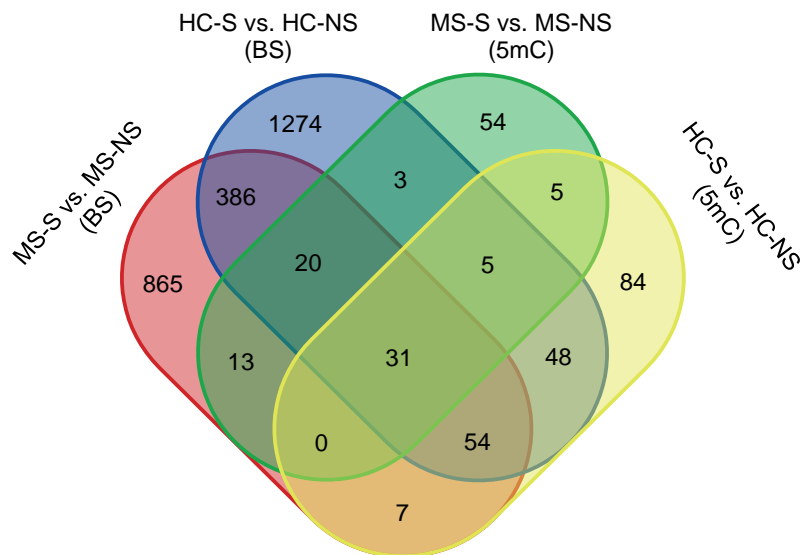

**Supplementary Figure 2.** Overlap of smoking-associated changes in Multiple Sclerosis (MS) patients and healthy controls (HC).

**a-c.** Distribution (violin plot, left) and correlation (scattered plot, right) of effect size ( $\Delta\beta$ -values) in MS and HC at: **(a)** smoking-associated BS-DMPs in MS patients (MS-S vs MS-NS, adjusted  $P < 0.05$ ) but not significant in HC (HC-S vs. HC-NS, not significant), **(b)** smoking-associated BS-DMPs in HC (HC-S vs. HC-NS, adjusted  $P < 0.05$ ) but not significant in MS (MS-S vs. MS-NS) and **(c)** smoking-associated BS-DMPs in both MS and HC individuals, with delta.beta and beta-values illustrated in the left and right panels, respectively. **d.** Venn diagram of the smoking-associated BS-DMPs and 5mC-DMPs (adjusted  $p < 0.05$ ) in MS patients (MS-S vs-MS-NS) and HC (HC-S vs. HC-NS).

### NEW Supplementary Figure 3

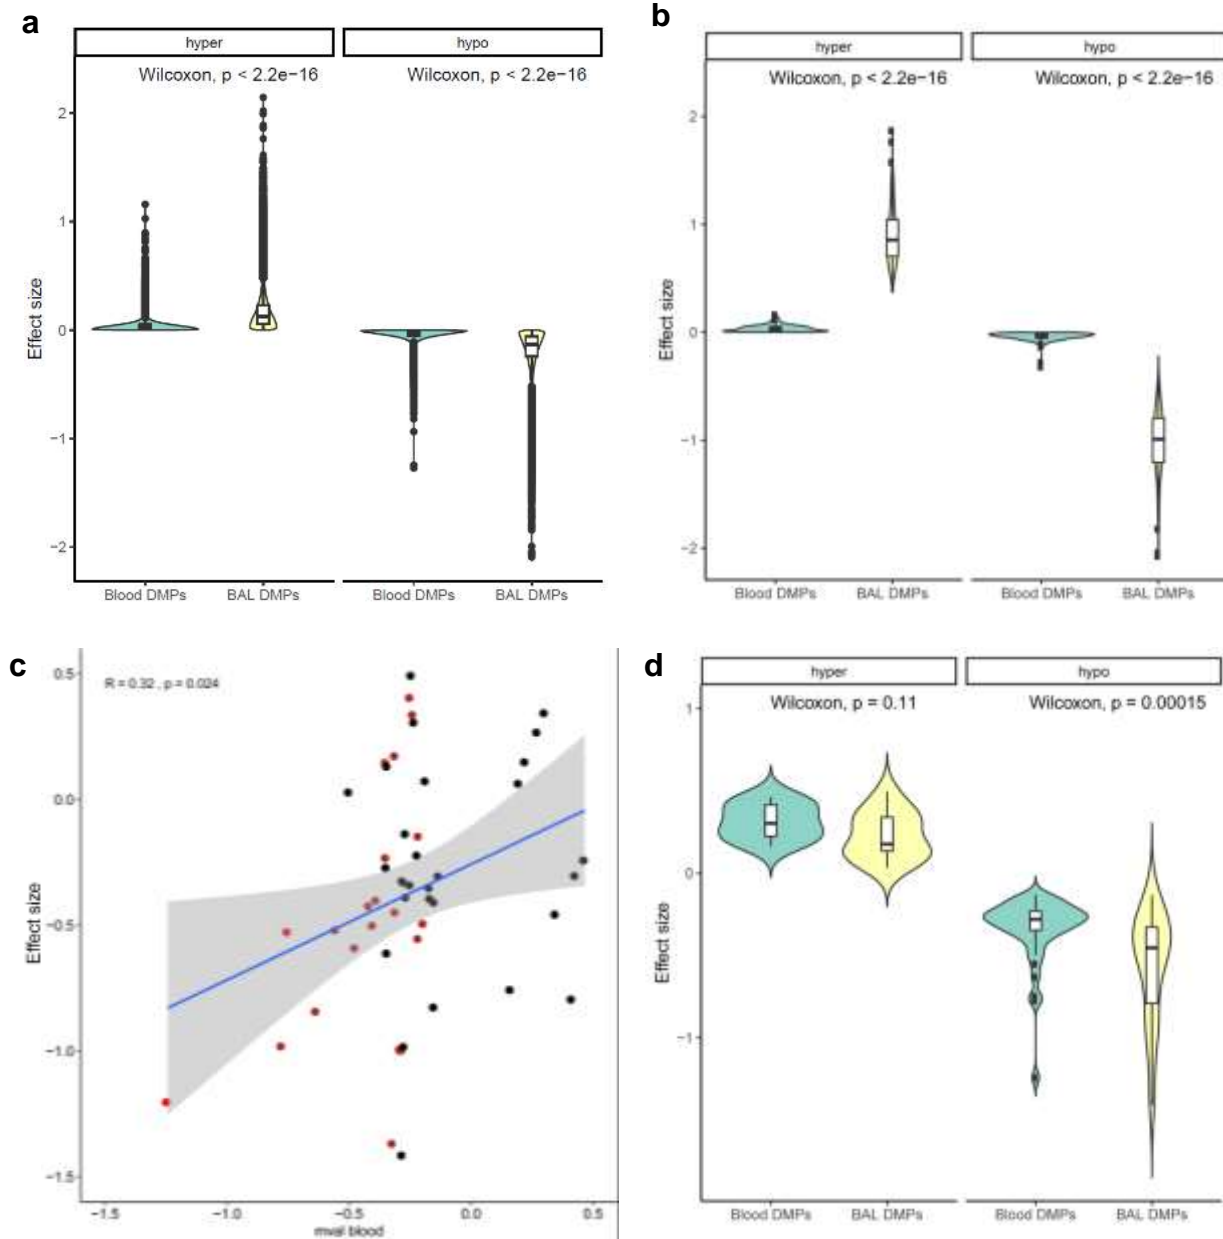

**Supplementary Figure 3.** Smoking effect in blood DMPs and BAL BS-DMPs of MS individuals.

**a.** Violin plot showing effect size at probes shared between BAL and blood ( $n=382277$ ). **b** Violin plot representing all significant BS-DMPs in BAL with the corresponding probes in blood ( $n=507$ ). **c.** Correlation scatterplot of blood BS-DMPs effect sizes (from M values) at  $FDR < 0.05$  ( $n = 50$ ) on the x-axis, and overlapping BAL BS-DMPs values on the y-axis. Red dots represent overlap with significant BAL BS-DMPs at  $FDR < 0.05$ , while dark red dots represent BAL BS-DMPs at  $P < 0.05$ . **d.** Violin plot showing effect size at significant BS-DMPs in blood with the corresponding probes in BAL ( $n=50$ ). Effect size is based on M-values.

## Supplementary Figure 4

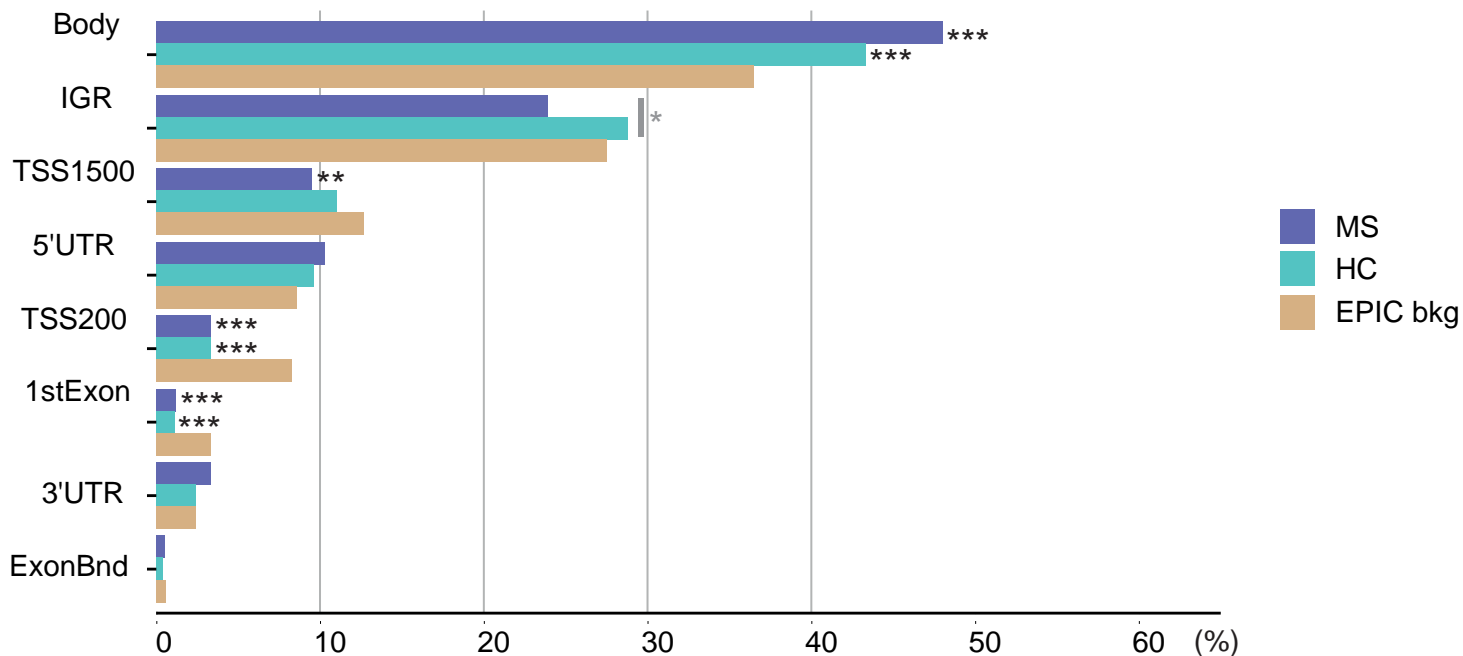

**Supplementary Figure 4.** Distribution of smoking-associated changes in Multiple Sclerosis (MS) patients and healthy controls (HC) across gene features.

Horizontal barplots representing relative frequencies of BS-DMPs associated with smoking in MS and HC across gene features (TSS1500, TSS200, 1stExon, 5'UTR, Body, 3'UTR, ExonBnd, IGR). Enrichment/depletion analysis was performed using Chi-square test on frequencies, with P-values adjusted for multiple testing (Bonferroni). Asterisk symbols in black (\*) represent significance levels from Bonferroni-adjusted Chi-square tests of smoking-associated MS and HC BS-DMP profiles when compared to the EPIC array probe background. Asterisk symbols in grey \* represent Bonferroni-adjusted significance levels from smoking-associated BS-DMPs of MS compared to those of HC.

\*P-value < 0.05, \*\*P-value < 0.01, \*\*\*P-value < 0.001.

# Supplementary Figure 5

**a**

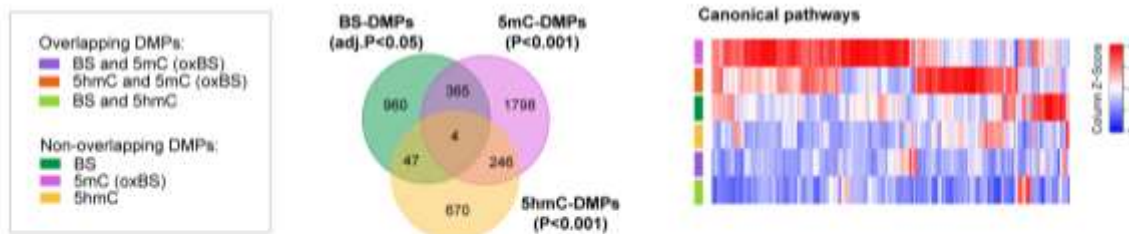

**b**

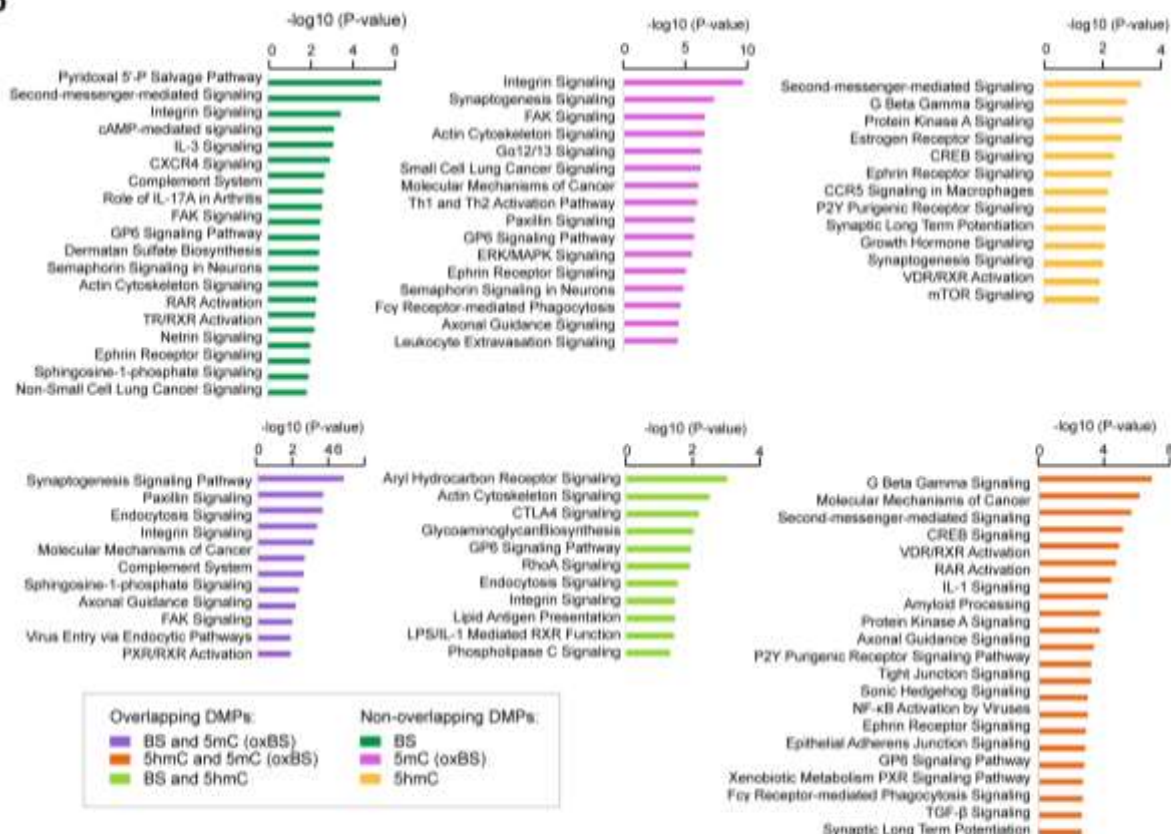

**c**

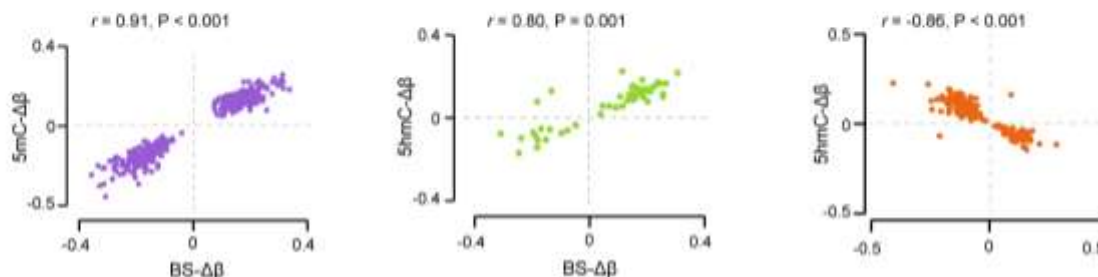

**Supplementary Figure 5.** Gene ontology (GO) analysis of overlapping and non-overlapping smoking-associated BS, 5mC and 5hmC changes in MS patients.

**a.** Venn-diagram illustrating the overlap of DMPs between BS (adjusted  $P < 0.05$ ), oxBS (5mC) and 5mC or 5hmC ( $P < 0.001$ ) and heatmap of overlapping Canonical pathways (from Ingenuity Pathway analysis, IPA) with blue to red colors low to high enrichment  $-\log_{10}(P\text{-value})$ . **b.** Top Canonical Pathways (IPA) enriched in overlapping/non-overlapping DMPs. **c.** Correlation of  $\Delta\beta$ -values between overlapping BS-5mC (left panel), BS-5hmC (middle panel) as well as 5mC-5hmC (right panel) DMPs. P-values and Spearman's rank correlation coefficient ( $r$ ) are given.
